# Supplementary material for: Extremophile at a Glance: Ostracod Crustacean From a Chemoautotrophic Sulphidic Cave Ecosystem
Source: Research Square preprint supplement (doi:10.21203/rs.3.rs-952295/v1), 2021-10-11

## SUPPLEMENTARY MATERIALS

Sanda Iepure, Anna Wysocka, Serban M. Sarbu, Michalina Kijowska, Tadeusz Namiotko

**Extremophile at a glance: ostracod crustacean from a chemoautotrophic sulfidic cave ecosystem**

### **Description of a new species *Pseudocandona movilaensis* sp. nov.**

Carapace medium-sized with triangular lateral view and the greatest height at or just behind mid-length (at 50-60% of the length). Holotype female left valve (LV): length (L) = 1.1 mm, height (H) = 0.59 mm, H/L = 0.54. Carapace measurements of female paratypes: L = 0.98-1.05 mm (mean  $\pm$  standard deviation SD =  $1.006 \pm 0.021$ , N = 9), H = 0.58-0.59 mm (mean  $\pm$  SD =  $0.582 \pm 0.004$ , N = 9), H/L = 0.56-0.59 (mean  $\pm$  SD =  $0.579 \pm 0.009$ , N = 9). LV overlaps right valve (RV) at both extremities. Female LV (Fig. 1A, D, Fig. S1A) relatively high (H/L = 0.53) and triangular in lateral view with greatest H located behind mid-length (54% of valve L). Dorsal margin of LV roundly arched with distinctive hump that overlaps RV. Ventral margin of LV slightly concave. Anterior and posterior margins infracurcate (i.e., unevenly curved with apex below mid-length), posterior one being more inflated. Calcified inner lamella not evenly curved, slightly wider at the antero-ventral and postero-ventral margins, at the anterior end of LV amounting to c. 10-11% of the valve L and ca. 2.4 $\times$  as wide as posteriorly. Female RV (Fig. 1B-C, Fig. S1B) more trapezoidal in outline than the LV and lower in height, with the greatest H situated at 58% of L and with almost straight and then slightly concave antero-dorsal margin. Central muscle scar arrangement typical of the subfamily Candoninae (Fig. 1C). Valve surface smooth with fine ornamentation (shallow pits) only on the anterior and posterior margins, and covered with short and stiff setae on the entire area. Colour white.

Sexual dimorphism in size and shape of the carapace weakly expressed, male carapace slightly larger. Left male valve (Fig. 1E, Fig. S1C) similar to that of female (L = 1.18 mm) but slightly higher (H = 0.61 mm) with H/L = 0.52 and less triangular with postero-dorsal margin more rounded. RV (Fig. 1F) L = 1.21 mm, H = 0.61, H/L = 0.50. Carapace measurements of other male paratype L = 1.02 mm, H = 0.60 mm, H/L = 0.59.

Juvenile carapaces and valves of the last four juvenile stages (A-1 to A-4) are presented in Fig. S2. Carapace of A-1 juvenile viewed dorsally moderately compressed with greatest W inferior to 1/2 L and situated just behind mid-length (56-57% of L). Anterior end

slightly beak-shaped, posterior ends slightly pointed. Valve surface of A-3 juvenile with reticulate ornamentation.

Antennule A1 (Fig. S3A) with total of seven articulated segments. First segment bearing two long setae on dorsal margin and two long setae on ventral-distal corner. Second and third segments each with one dorsal-apical seta almost twice the length of the segments. Fourth and fifth segments each with two long dorsal-apical setae and one short ventral-apical seta. Penultimate segment with one short and three medium-length setae distally. Terminal segment with two long setae, one short seta and aesthetasc  $y_a$  as long as the terminal segment.

Female antenna A2 (Fig. 2A) with protopodite bearing reduced exopodite and 3-segmented endopodite. Protopodite typically with one long smooth basal seta. Exopodial plate with two very short setae and one long thin seta longer than the first endopodial segment (EI). Aesthetasc Y equalling c. 0.37 of EI (the sensory part of this organ represents 45% of its L). Setae  $t_1$ - $t_4$  short, representing 0.31-0.34 EI length. Relative lengths of claws, some setae and the remaining aesthetascs as compared with the L of EI as:  $G_1$  (claw) = 0.96,  $G_2$  (claw) = 0.57,  $G_3$  (claw) = 1,  $z_1$  = 0.15 (seta like),  $z_2$  and  $z_3$  (setae) = c. 0.17,  $G_M$  (claw) = 0.77,  $G_m$  (claw) = 0.36;  $y_1$  = 0.1,  $y_2$  = 0.1 and  $y_3$  = 0.31 (sensory part hardly visible). Claw  $G_1$  about 1.6 and claw  $G_M$  about 1.3 length of the anterior margin of combined endopodial podomeres EII and EIII.

Male antenna (Fig. 2B, Fig. S4A) with 3-segmented endopodite, 2nd endopodial segment not divided and with no male bristles. Seta  $z_1$  transformed into long claw almost equalling (0.94) to length of claw  $G_2$ , setae  $z_2$  and  $z_3$  very short. Claw  $G_1$  less than half length of claws  $G_2$  and  $z_1$ . Claw  $G_m$  approximately 3/4 length of claw  $G_M$ . Claw  $G_2$  about 1.6 and claw  $G_M$  about 1.3 length of the anterior margin of 2nd undivided endopodial segment.

Mandible, Md (Fig. S3B, Fig. S4C) consists of the coxal plate and a 4-segmented palp Mdp. Coxa typically elongated and heavily chitinized with the masticatory part bearing one seta, seven strong teeth interspaced with sets of diverse setae and one outer lateral strong claw. First Mdp podomere externally with the exopodite plate. Inner margin of 2nd podomere of Mdp with three setae of the so-called setal group, beta seta and one neighbouring seta. Outer edge of this segment with two apical setae. Externo-distal gamma-seta on 3rd podomere smooth. Anterior claw of the terminal podomere amounting to 2.3 and posterior to 1.9 of the L of the 3rd palp podomere. The relative L of one distal seta on the 4th palp podomere 1.7 of the L of the 3rd palp podomere.

Maxillula (Fig. S4D) and female fifth limb with morphology typical of the subfamily.

Fifth limb endopodite palps (clasping organs) of male asymmetrical. Right palp (Fig. 2D, Fig. S4E) rounded, widening distally, more inflated than left, bearing two sup-apical setae. Left palp (Fig. 2F) distally narrower than right, with finger-like distal end bearing two sub-apical setae.

Walking leg, L6 (Fig. S3C) five segmented. Setae e, f and g smooth (length ratio  $e \approx f > g$ ). Terminal segment sub-rectangular in shape, with two short ( $h_1$ ,  $h_3$ ) setae, and  $h_2$  seta long and claw-like.

Cleaning leg, L7 (Fig. S3D, Fig. S4F) 4-segmented, endopodial segments EII and EIII fused. Protopodite with three setae ( $d_1$ ,  $d_2$  and  $d_p$ ). Short terminal seta  $h_1$  twice the terminal segment and only slightly curved. Relative lengths of three apical setae related to endopodial segment EI as:  $h_1 = 0.2$ ,  $h_2 = 1.37$ ,  $h_3 = 1.37$ . Seta g as 0.77 of the length of EI.

Uropodal ramus, CR (Fig. 2C, Fig. S4F, Fig. S5A) with anterior claw  $G_a$  serrated and strongly curved, while posterior  $G_p$  remarkably reduced, less than half of  $G_a$ . Anterior seta  $s_a$  short, posterior seta  $s_p$  c. 1.5 the length of  $s_a$ .

Female genital lobe protruding and rounded (Fig. S3E, Fig. S5A).

Hemipenis (Fig. 2E, Fig. S5C-D). Outer lobe (a) with sub-rectangular distal end. Medial lobe (h) is the longest and distally roundly pointed. Inner lobe (b) well developed, distally broadly rounded, with a distinct, acuminate expansion oriented to the postero-ventral end of the body. M-process with a small proximal plate, and a weakly sclerotized and elongated distal part.

Zenker organ (Fig. S5B) with seven rosettes of chitinous spines.

**Table S1**

Data on species used in molecular analyses: their origins, haplotypes and GenBank Accession numbers of the obtained sequences.

| <b>Species</b>                            | <b>Locality, country</b>       | <b>COI haplotypes with species codes<br/>(number of specimens)</b> | <b>GenBank<br/>Accession numbers</b>      |
|-------------------------------------------|--------------------------------|--------------------------------------------------------------------|-------------------------------------------|
| <i>Pseudocandona movilaensis</i> sp. nov. | Movile Cave, Romania           | PMOV1(3)                                                           | MN013132                                  |
| <i>Pseudocandona albicans</i>             | Gdansk, Poland                 | PALB1(1), PALB3(1)                                                 | MN013121, MN013122                        |
|                                           | Oslo, Norway                   | PALB2(3)                                                           | MN013123                                  |
| <i>Pseudocandona compresa</i>             | Lake Ptasi Raj-Gdansk, Poland  | PCOM1(2), PCOM2(2), PCOM3(2),<br>PCOM4(1)                          | MN013099, MN013100,<br>MN013101, MN013102 |
| <i>Pseudocandona hartwigi</i>             | Lake Otomińskie-Gdansk, Poland | PHAR1(2)                                                           | MN013133                                  |
| <i>Pseudocandona marchica</i>             | Oslo, Norway                   | PMAR1(1), PMAR2(2)                                                 | MN013130, MN013131                        |
| <i>Typhlocypris eremita</i>               | Gilau, Romania                 | TERE1(1), TERE2(1), TERE3(4),<br>TERE4(1), TERE5(1)                | MN013095, MN013096,<br>MN013097, MN013098 |
| <i>Typhlocypris sywulai</i>               | Duderina Jama, Croatia         | TSYW1(1), TSYW2(1), TSYW3(1)                                       | MN013093, MN013094                        |
| <i>Candona candida</i>                    | Gdańsk, Poland                 | CCAN1(1)                                                           | MN013107                                  |
|                                           | Łączyński Młyn, Poland         | CCAN2(2)                                                           | MN013105                                  |
|                                           | Lake Raduńskie Górne, Poland   | CCAN3(2)                                                           | MN013106                                  |
| <i>Candona weltneri</i>                   | Lake Nierzostwo, Poland        | CWEL1(1), CWEL2(1)                                                 | MN013103, MN013104                        |

**Table S2**

Mean interspecific genetic distance calculated with Kimura 2-parameter method between ostracod species analyzed in this study (for species codes see Table S1).

| Species | PMOV  | PMAR  | PHAR  | PALB  | PCOM  | TERE  | TSYW  | CCAN  |
|---------|-------|-------|-------|-------|-------|-------|-------|-------|
| PMOV    |       |       |       |       |       |       |       |       |
| PMAR    | 0.150 |       |       |       |       |       |       |       |
| PHAR    | 0.149 | 0.161 |       |       |       |       |       |       |
| PALB    | 0.193 | 0.211 | 0.196 |       |       |       |       |       |
| PCOM    | 0.207 | 0.223 | 0.208 | 0.218 |       |       |       |       |
| TERE    | 0.227 | 0.237 | 0.213 | 0.262 | 0.222 |       |       |       |
| TSYW    | 0.244 | 0.205 | 0.224 | 0.235 | 0.220 | 0.092 |       |       |
| CCAN    | 0.256 | 0.252 | 0.265 | 0.261 | 0.261 | 0.238 | 0.242 |       |
| CWEL    | 0.240 | 0.238 | 0.228 | 0.221 | 0.201 | 0.259 | 0.256 | 0.167 |

**Table S3**

Genetic distance calculated with Kimura 2-parameter method between haplotypes of the studied ostracod species (for species and haplotype codes see Table S1).

| Haplotype | PMA<br>R<br>1 | PMA<br>R<br>2 | PAL<br>B<br>1 | PAL<br>B<br>3 | PAL<br>B<br>2 | CWE<br>L<br>1 | CWE<br>L<br>2 | CCA<br>N<br>2 | CCA<br>N<br>3 | CCA<br>N<br>1 | PMO<br>V<br>1 | TERE<br>1 | TERE<br>2 | TERE<br>4 | TERE<br>3 | PHA<br>R<br>1 | PCO<br>M<br>1 | PCO<br>M<br>2 | PCO<br>M<br>3 | PCO<br>M<br>4 | TSY<br>W<br>1 | TSY<br>W<br>2 |
|-----------|---------------|---------------|---------------|---------------|---------------|---------------|---------------|---------------|---------------|---------------|---------------|-----------|-----------|-----------|-----------|---------------|---------------|---------------|---------------|---------------|---------------|---------------|
| PMAR2     | 0.002         |               |               |               |               |               |               |               |               |               |               |           |           |           |           |               |               |               |               |               |               |               |
| PALB1     | 0.214         | 0.217         |               |               |               |               |               |               |               |               |               |           |           |           |           |               |               |               |               |               |               |               |
| PALB3     | 0.209         | 0.212         | 0.009         |               |               |               |               |               |               |               |               |           |           |           |           |               |               |               |               |               |               |               |
| PALB2     | 0.207         | 0.209         | 0.005         | 0.007         |               |               |               |               |               |               |               |           |           |           |           |               |               |               |               |               |               |               |
| CWEL1     | 0.235         | 0.238         | 0.227         | 0.219         | 0.222         |               |               |               |               |               |               |           |           |           |           |               |               |               |               |               |               |               |
| CWEL2     | 0.238         | 0.240         | 0.222         | 0.219         | 0.217         | 0.005         |               |               |               |               |               |           |           |           |           |               |               |               |               |               |               |               |
| CCAN2     | 0.251         | 0.253         | 0.260         | 0.262         | 0.265         | 0.168         | 0.166         |               |               |               |               |           |           |           |           |               |               |               |               |               |               |               |
| CCAN3     | 0.248         | 0.251         | 0.257         | 0.264         | 0.262         | 0.168         | 0.161         | 0.007         |               |               |               |           |           |           |           |               |               |               |               |               |               |               |
| CCAN1     | 0.254         | 0.256         | 0.257         | 0.260         | 0.263         | 0.170         | 0.168         | 0.012         | 0.012         |               |               |           |           |           |           |               |               |               |               |               |               |               |
| PMOV1     | 0.149         | 0.151         | 0.197         | 0.192         | 0.190         | 0.237         | 0.243         | 0.256         | 0.254         | 0.257         |               |           |           |           |           |               |               |               |               |               |               |               |
| TERE1     | 0.235         | 0.238         | 0.261         | 0.263         | 0.258         | 0.261         | 0.258         | 0.239         | 0.239         | 0.239         | 0.225         |           |           |           |           |               |               |               |               |               |               |               |
| TERE2     | 0.235         | 0.238         | 0.261         | 0.263         | 0.258         | 0.258         | 0.255         | 0.236         | 0.236         | 0.236         | 0.225         | 0.011     |           |           |           |               |               |               |               |               |               |               |
| TERE4     | 0.238         | 0.241         | 0.264         | 0.266         | 0.261         | 0.261         | 0.258         | 0.239         | 0.234         | 0.234         | 0.228         | 0.009     | 0.013     |           |           |               |               |               |               |               |               |               |
| TERE3     | 0.235         | 0.238         | 0.266         | 0.269         | 0.264         | 0.264         | 0.261         | 0.241         | 0.241         | 0.241         | 0.230         | 0.014     | 0.004     | 0.016     |           |               |               |               |               |               |               |               |
| PHAR1     | 0.160         | 0.163         | 0.195         | 0.200         | 0.193         | 0.228         | 0.228         | 0.267         | 0.259         | 0.268         | 0.149         | 0.214     | 0.209     | 0.217     | 0.214     |               |               |               |               |               |               |               |
| PCOM1     | 0.226         | 0.228         | 0.225         | 0.220         | 0.217         | 0.203         | 0.205         | 0.265         | 0.263         | 0.265         | 0.210         | 0.225     | 0.230     | 0.225     | 0.235     | 0.212         |               |               |               |               |               |               |
| PCOM2     | 0.211         | 0.213         | 0.223         | 0.217         | 0.215         | 0.203         | 0.200         | 0.257         | 0.254         | 0.262         | 0.205         | 0.212     | 0.217     | 0.212     | 0.222     | 0.200         | 0.037         |               |               |               |               |               |
| PCOM3     | 0.223         | 0.226         | 0.222         | 0.217         | 0.215         | 0.200         | 0.203         | 0.262         | 0.260         | 0.263         | 0.207         | 0.222     | 0.227     | 0.222     | 0.232     | 0.215         | 0.002         | 0.035         |               |               |               |               |
| PCOM4     | 0.226         | 0.228         | 0.220         | 0.214         | 0.212         | 0.196         | 0.198         | 0.260         | 0.257         | 0.260         | 0.205         | 0.214     | 0.220     | 0.214     | 0.225     | 0.207         | 0.007         | 0.029         | 0.005         |               |               |               |
| TSYW1     | 0.206         | 0.208         | 0.235         | 0.237         | 0.232         | 0.259         | 0.254         | 0.247         | 0.242         | 0.244         | 0.247         | 0.098     | 0.096     | 0.098     | 0.092     | 0.225         | 0.227         | 0.214         | 0.224         | 0.222         |               |               |
| TSYW2     | 0.203         | 0.206         | 0.240         | 0.242         | 0.237         | 0.259         | 0.254         | 0.244         | 0.239         | 0.241         | 0.244         | 0.094     | 0.092     | 0.094     | 0.087     | 0.225         | 0.224         | 0.212         | 0.222         | 0.219         | 0.004         |               |
| TSYW3     | 0.201         | 0.204         | 0.230         | 0.233         | 0.228         | 0.257         | 0.251         | 0.244         | 0.239         | 0.239         | 0.242         | 0.092     | 0.090     | 0.092     | 0.086     | 0.221         | 0.223         | 0.210         | 0.220         | 0.217         | 0.005         | 0.009         |

# Figure S1

*Pseudocandona movilaensis* sp. nov. A. External view of female left valve. B. External view of female right valve. C. External view of male left valve.

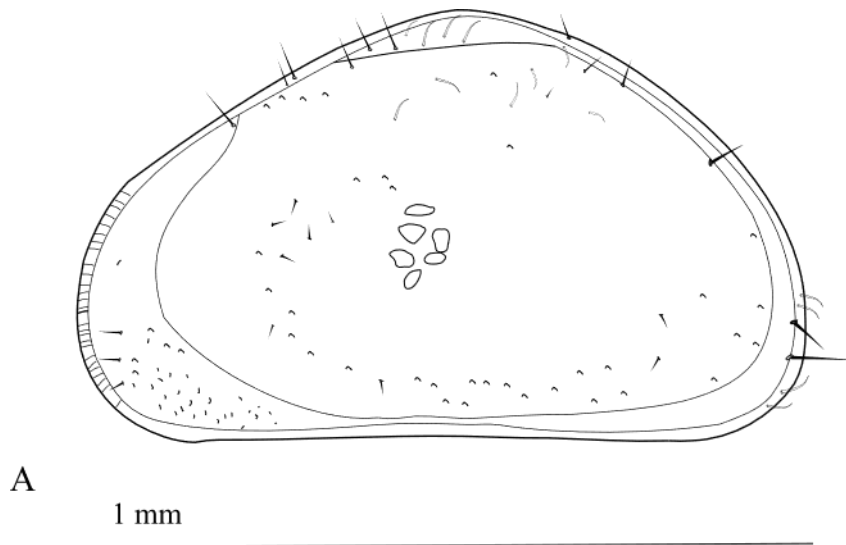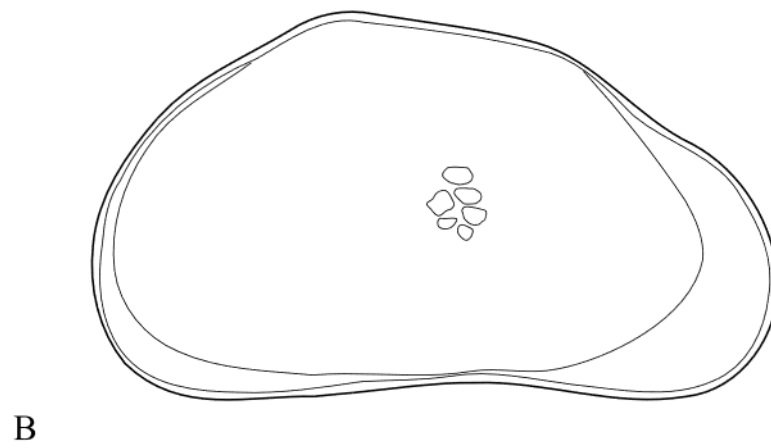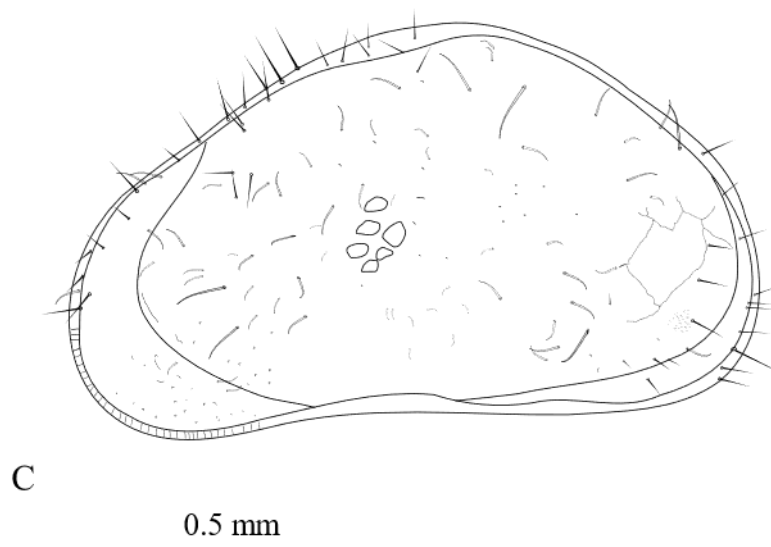

## Figure S2

*Pseudocandona movilaensis* sp. nov. juvenile carapace and valves. A. Dorsal view of juvenile A-1, anterior to left. B. External view of juvenile A-1 left valve. C. Internal view of juvenile A-1 right valve. D. External view of juvenile A-1 right valve. E. Internal view of juvenile A-2 left valve. F. External view of juvenile A-2 left valve. G. internal view of juvenile A-2 right valve. H. External view of juvenile A-2 right valve. I. internal view of juvenile A-3 left valve. J. External view of juvenile A-3 right valve. K. Internal view of juvenile A-4 left valve. L. Internal view of juvenile A-4 right valve.

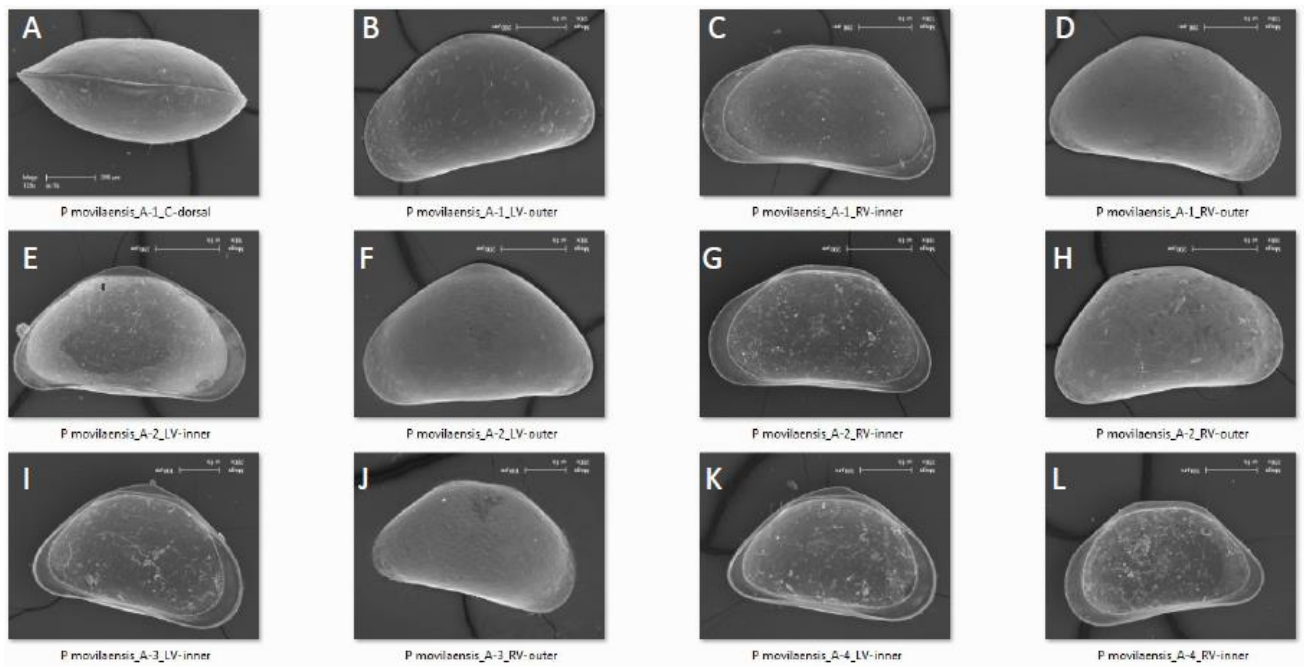



### Figure S3

*Pseudocandona movilaensis* sp. nov. (female) A. Antennule. B. Mandibula. C. Sixth limb (walking leg). D. Seventh limb (cleaning leg). Scale bars (100  $\mu$ m).

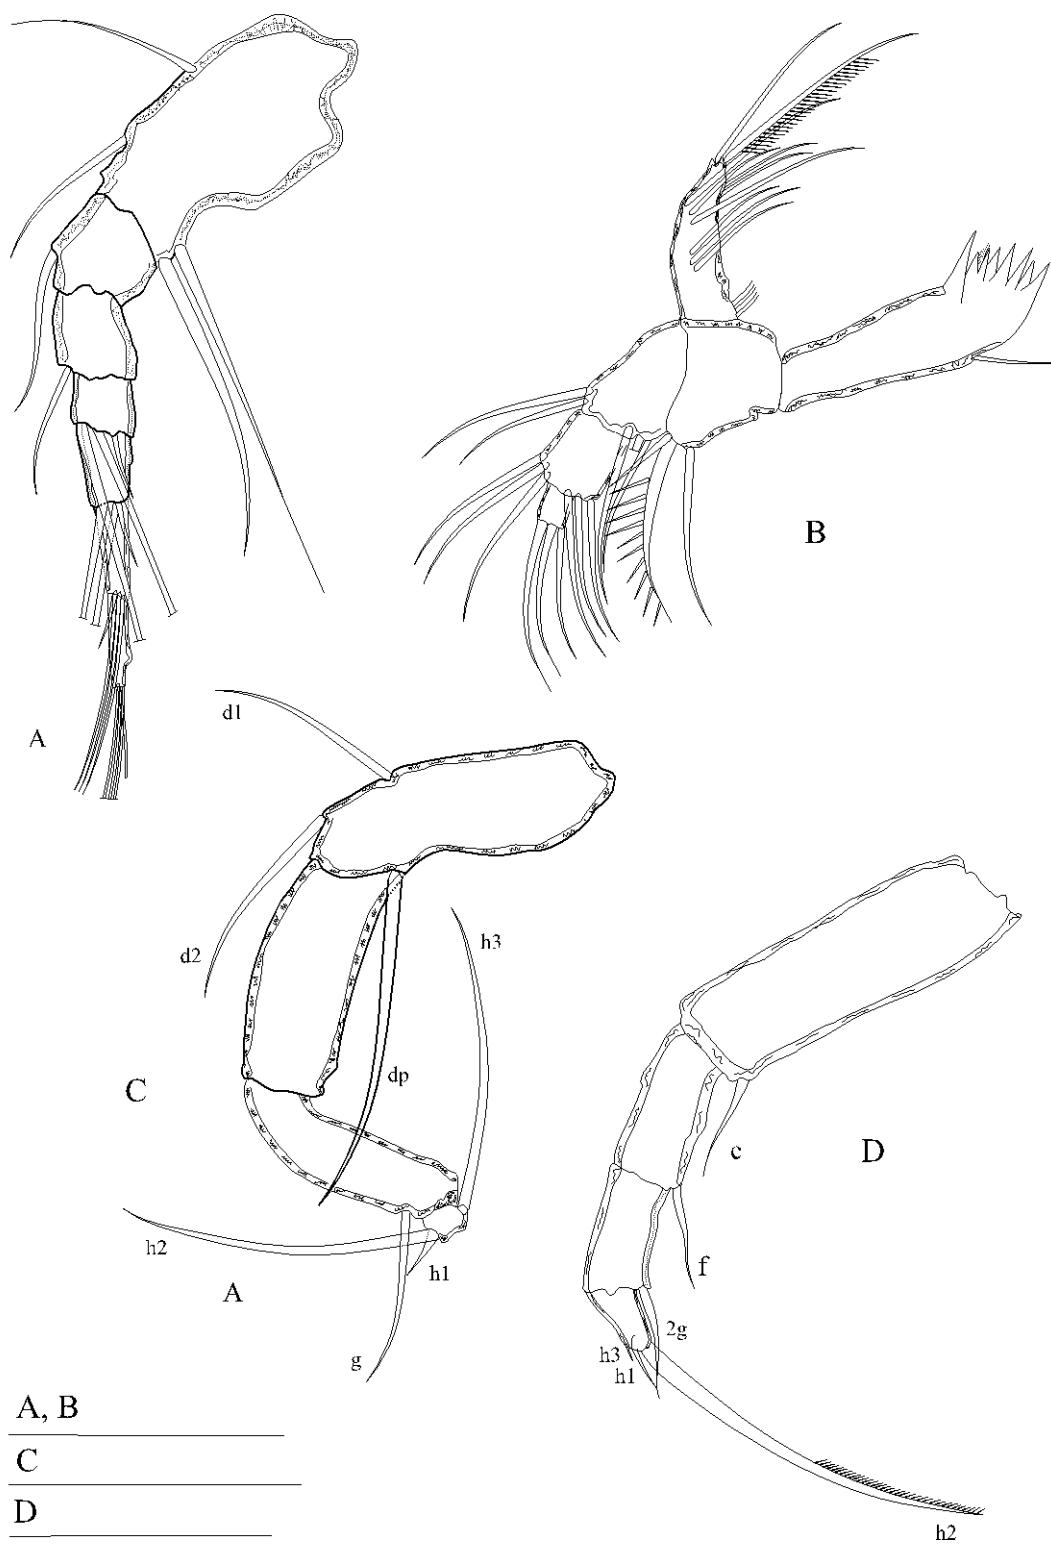

# Figure S4

*Pseudocandona movilaensis* sp. nov. (male). A. Antenna. B. Mandibula. C. Maxilla. D. Right fifth limb. E. Seventh limb (cleaning leg). F. Uropodal rami.

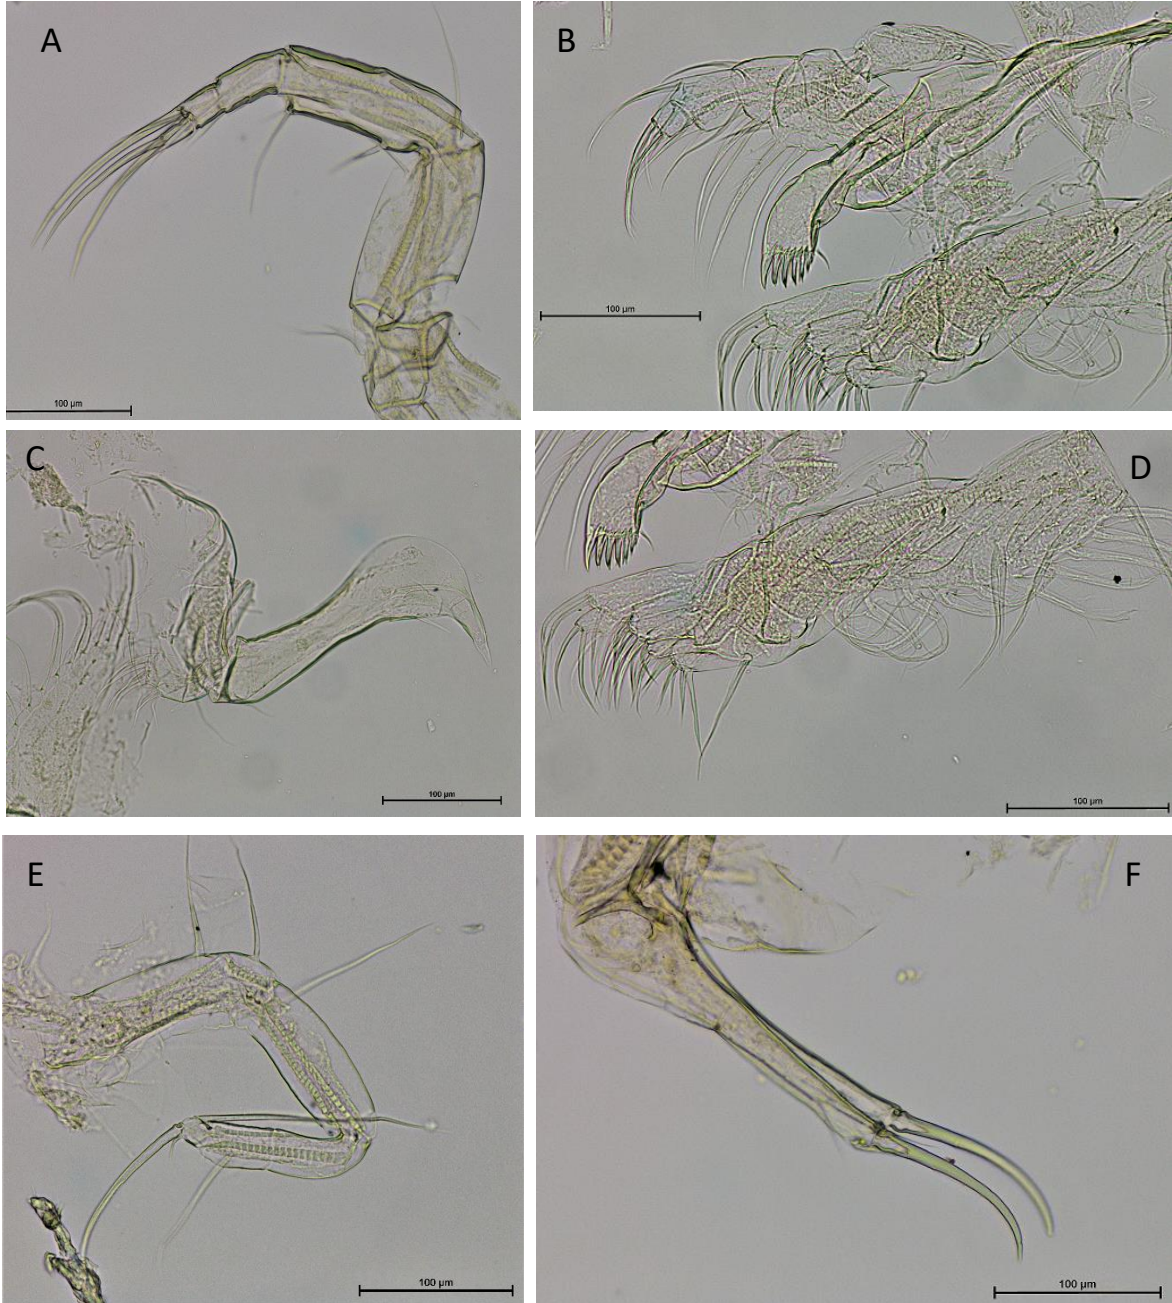

## Figure S5

*Pseudocandona movilaensis* sp. nov. A. Female uropodal rami and genital lobes. B. Male Zenker organ and uropodal rami. C. Hemipenis. D. Detail of the distal part of the ductus ejaculatorius in the erect position.

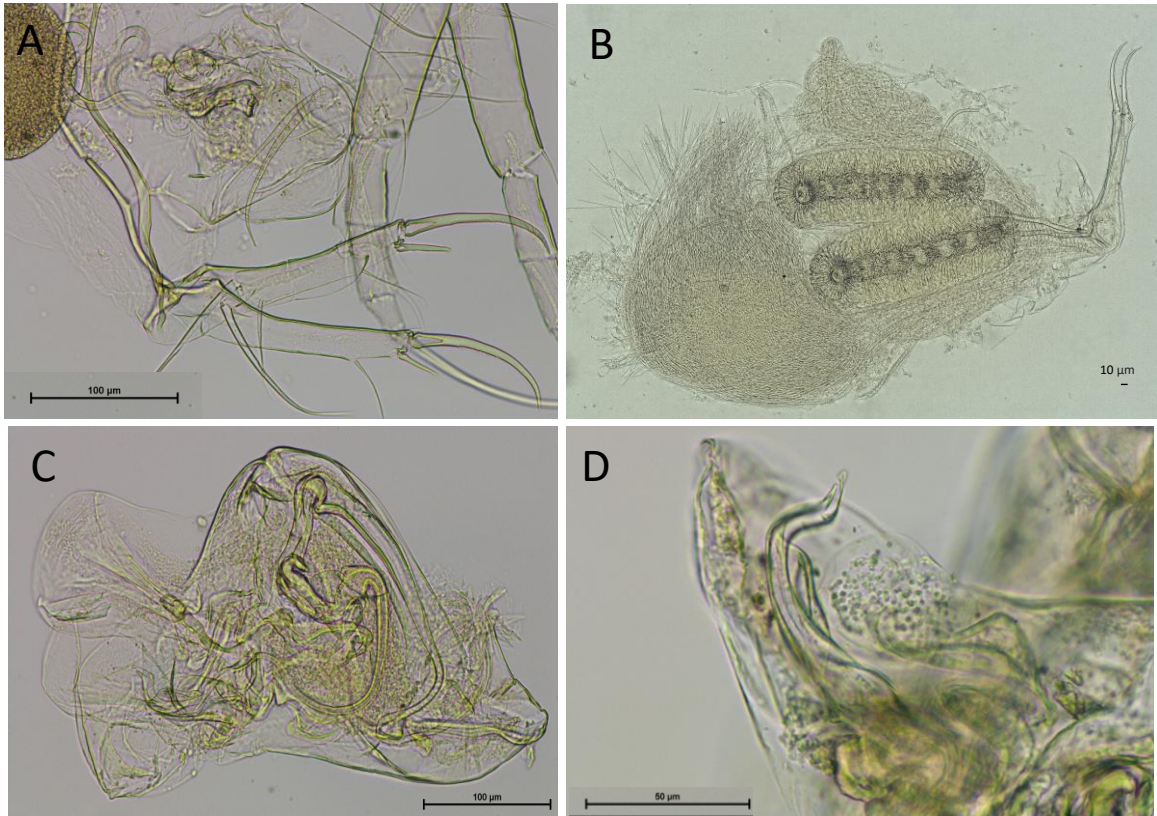

Supplement: Supplementary file [file 0153478b2ebaa2fa883d91d2.pdf]
